# Supplementary material for: Discovery of a new intercalation-type anode for high-performance sodium ion batteries
Source: Royal Society of Chemistry journal article supplement (doi:10.1039/c9ta03753e), 2019-01-01
Supplement: c9ta03753e1.pdf [file c9ta03753e1.pdf]

## Electronic Supplementary Information

### Discovery of a New Intercalation-Type Anode for High-Performance Sodium Ion Batteries

Yajun Zhao,<sup>a</sup> Tao Sun,<sup>a</sup> Qing Yin,<sup>a</sup> Jian Zhang,<sup>a</sup> Shuoxiao Zhang,<sup>a</sup> Jianeng Luo,<sup>a</sup> Hong Yan,<sup>a</sup> Lirong Zheng,<sup>b</sup> Jingbin Han,<sup>\*a</sup> and Min Wei<sup>a</sup>

*<sup>a</sup>. State Key Laboratory of Chemical Resource Engineering, Beijing Advanced Innovation Center for Soft Matter Science and Engineering, Beijing University of Chemical Technology, Beijing 100029, P. R. China.*

*<sup>b</sup>. Institute of High Energy Physics, Chinese Academy of Science, Beijing 100049, P. R. China.*

#### Author Information

\* Corresponding authors:

E-mail: [hanjb@mail.buct.edu.cn](mailto:hanjb@mail.buct.edu.cn)

## Materials characterizations

The morphology of the sample was observed by scanning electron microscope (SEM, Zeiss Supra55) with an accelerating voltage of 20 KV. High-resolution transmission electron microscopy (HRTEM) images were collected by a TECNAI G2 F30 instrument, equipped by an energy dispersive spectroscopy (EDS) to determine the distribution of Co and Fe. X-ray diffraction (XRD) patterns were recorded by a Rigaku D/max-2500B2+/PCX system with Cu K $\alpha$  radiation ( $\lambda = 0.15418$  nm) at 40 kV, 30 mA. Cyclic voltammetry was performed on a CHI660 electrochemical workstation (Chenhua Instruments Co., China). All the electrochemical measurements were carried out at room temperature. X-ray photoelectron spectroscopy (XPS, Thermo Electron Corporation ESCALAB 250 XPS spectrometer) were recorded using a twin anode Al K $\alpha$  X-ray source with a 30 eV pass energy and a 0.5 eV step size. The amount of water was analyzed by thermogravimetry and differential thermal analysis (TG-DTA) in air flow with a heating rate of 10 °C min<sup>-1</sup>. Elemental analysis was carried out using a Shimadzu ICPS-7500 inductively coupled plasma atomic emission spectroscopy (ICP-AES). Extend X-ray absorption fine structure spectroscopy (EXAFS) for the Co and Fe K-edge was performed at the beamline 1W1B of the Beijing Synchrotron Radiation Facility (BSRF), Institute of High Energy Physics (IHEP), Chinese Academy of Sciences (CAS).

## Theoretical calculations

Density functional theory (DFT) calculations were performed using the Vienna Ab-initio Simulation Package (VASP) on a supercell of 2 $\times$ 2 $\times$ 1. The gradient-corrected exchange correlation functional of Perdew-Burke-Ernzerh generalized-gradient-approximation (PBE-GGA) was employed.<sup>1,2</sup> A plane-wave basis with 480 eV energy cutoff was adopted using the

projector augmented wave (PAW) basis-set and the converge criteria of the force on each relaxed atoms below 0.1 eV/Å were used.<sup>3</sup> The convergence criteria were chosen such that the changes were  $10^{-5}$  eV for the energy. The vacuum region between slabs was 15 Å. A climbing image-nudged elastic band (CI-NEB) method was used to study the diffusion state using the  $5\times5\times1$  k-point sampling.<sup>4,5</sup> The calculation on diffusion barrier of Na was performed on two models of CoFe-LDH with interlayer spacing of 0.75 and 0.80 nm to simulated  $\text{CO}_3^{2-}$  and  $\text{NO}_3^-$  pillared LDH, respectively. To reduce the complexity of the calculation, the pre-existing interlayer species were omitted.

## Supplementary Figures

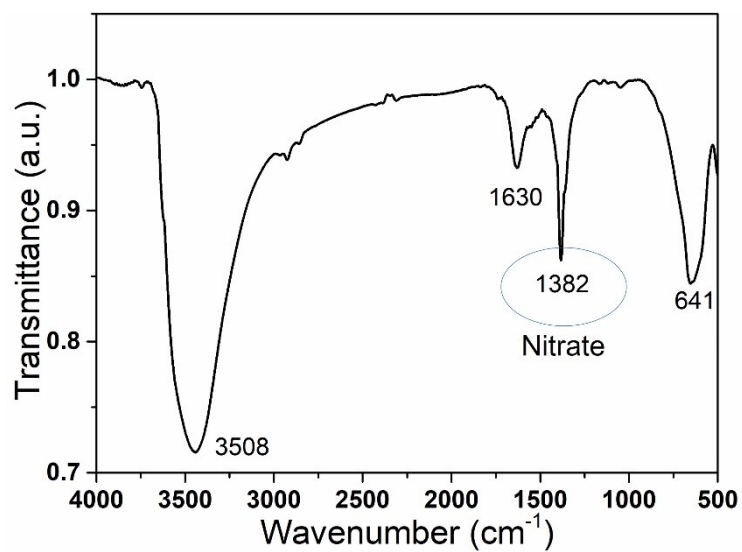

**Fig. S1** (a) FT-IR spectrum of nitrate-pillared CoFe-LDH.

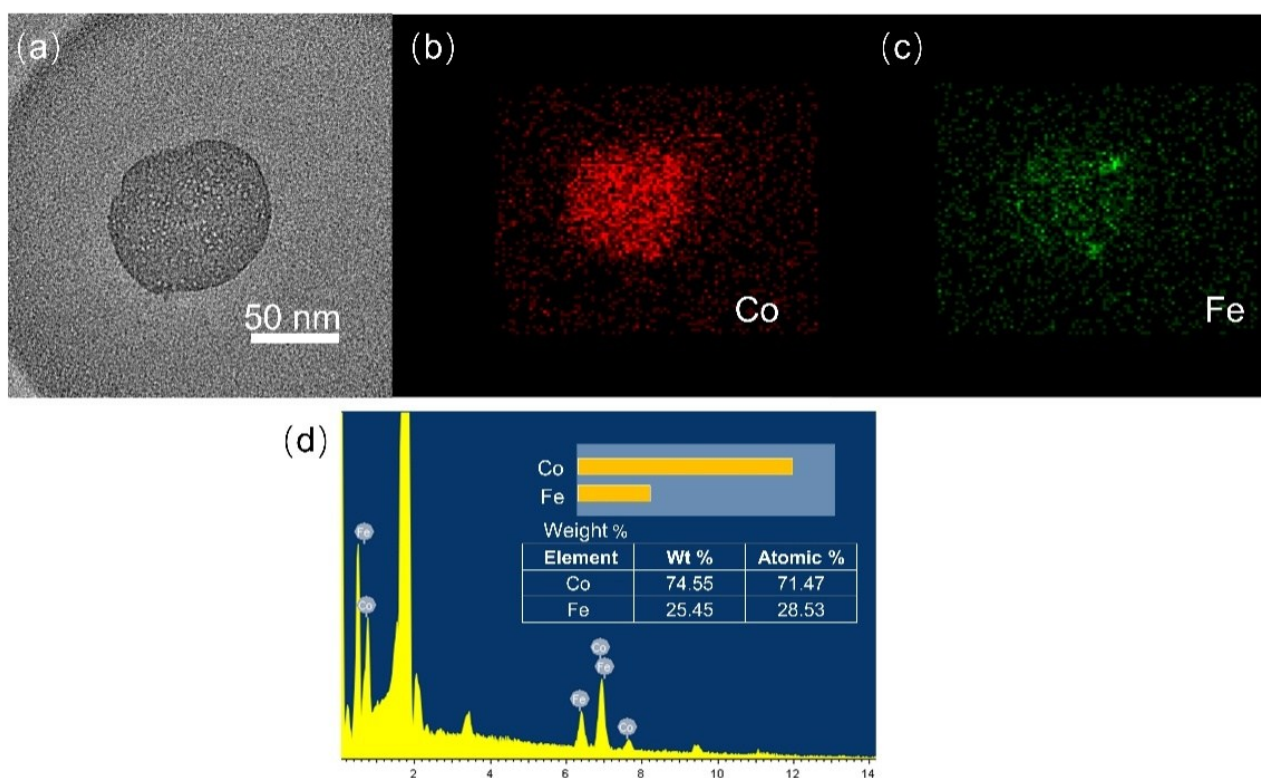

**Fig. S2** (a) HRTEM image and (b and c) elemental mapping images of an individual CoFe-NO<sub>3</sub><sup>-</sup>-LDH nanoplatelet. (d) EDX spectrum of the CoFe-NO<sub>3</sub><sup>-</sup>-LDH.

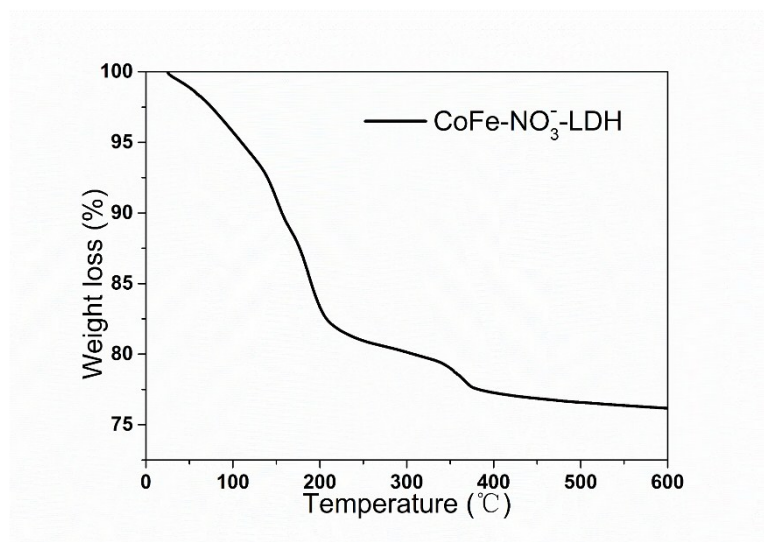

**Fig. S3** TG curve of the CoFe-NO<sub>3</sub><sup>-</sup>-LDH.

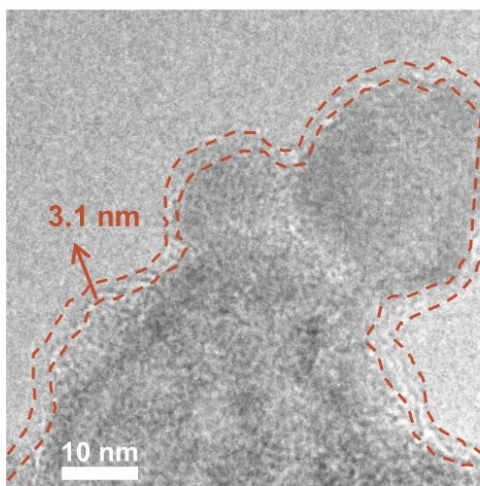

**Fig. S4** HR-TEM image of SEI film on the surface of CoFe-NO<sub>3</sub><sup>-</sup>-LDH nanoplatelet after 1 cycle of charge-discharge.

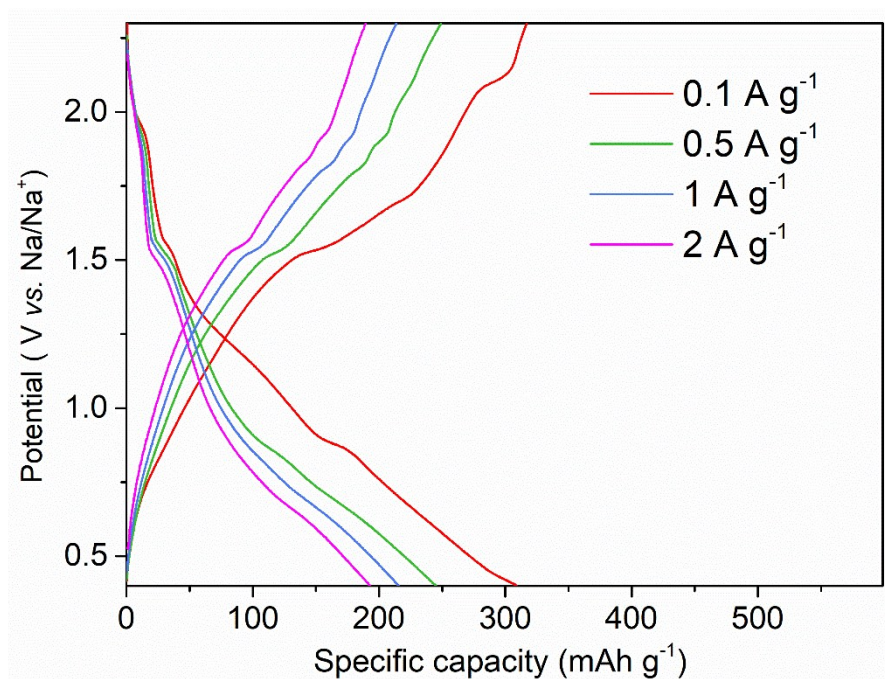

**Fig. S5** Galvanostatic charge/discharge curves of CoFe-NO<sub>3</sub>-LDH at various current densities.

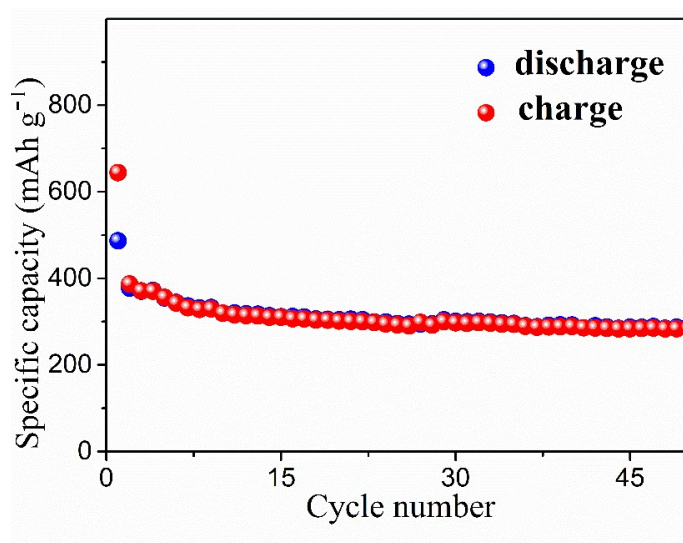

**Fig. S6** The cycling performance of CoFe-NO<sub>3</sub>-LDH at 100 mA g<sup>-1</sup>.

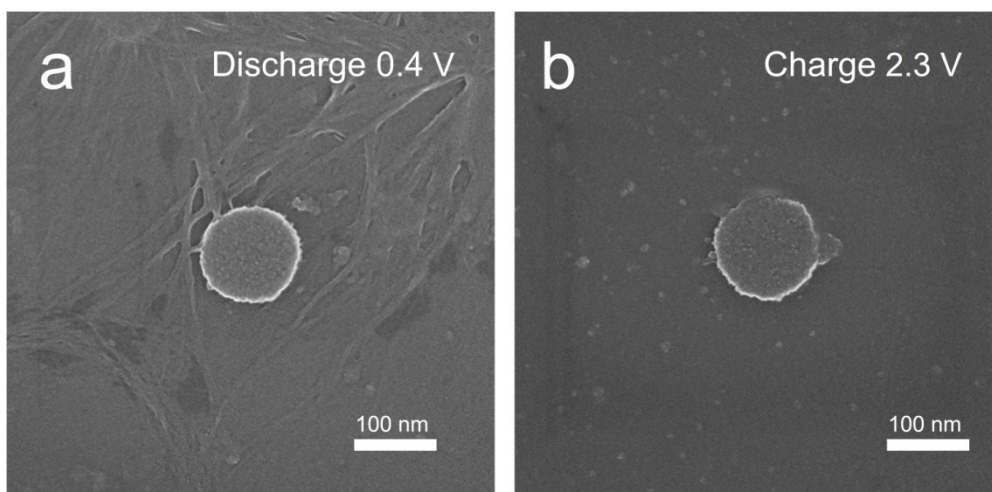

**Fig. S7** SEM image of CoFe-NO<sub>3</sub><sup>-</sup>-LDH electrodes coated by acetylene black after discharging to 0.4 V (a) and charging to 2.3 V (b).

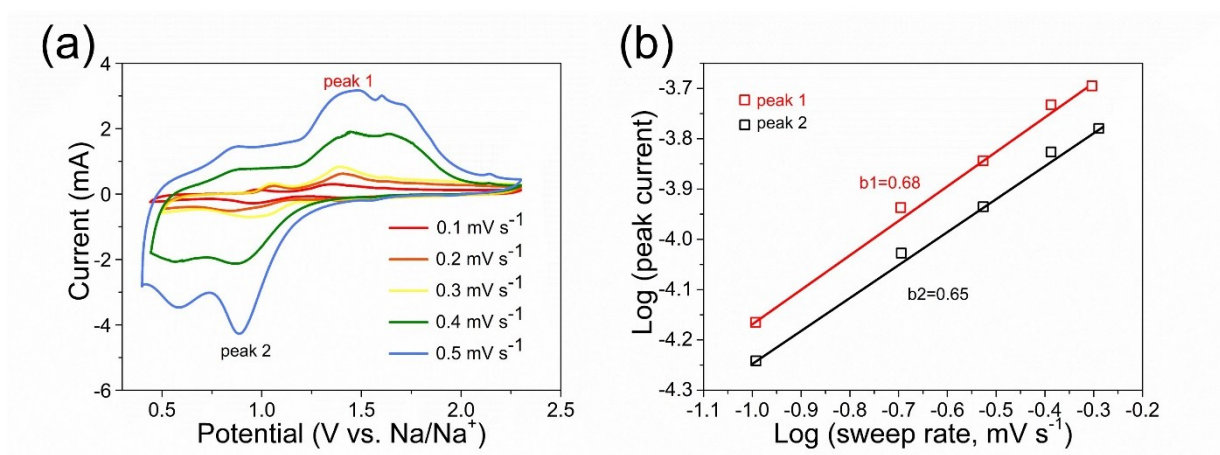

**Fig. S8** (a) Cyclic voltammograms of the CoFe-NO<sub>3</sub><sup>-</sup>-LDH electrode at various scan rates. (b) Determination of the  $b$  value using the relationship between peak current and scan rate.



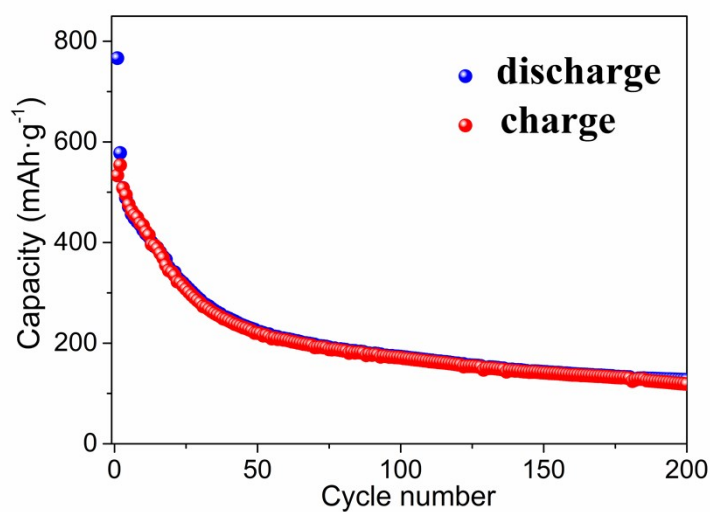

**Fig. S9** Cycling performance of CoFe-NO<sub>3</sub><sup>-</sup>-LDH electrode at a current density of 1 A g<sup>-1</sup> with a voltage window 0.01 V to 3 V.

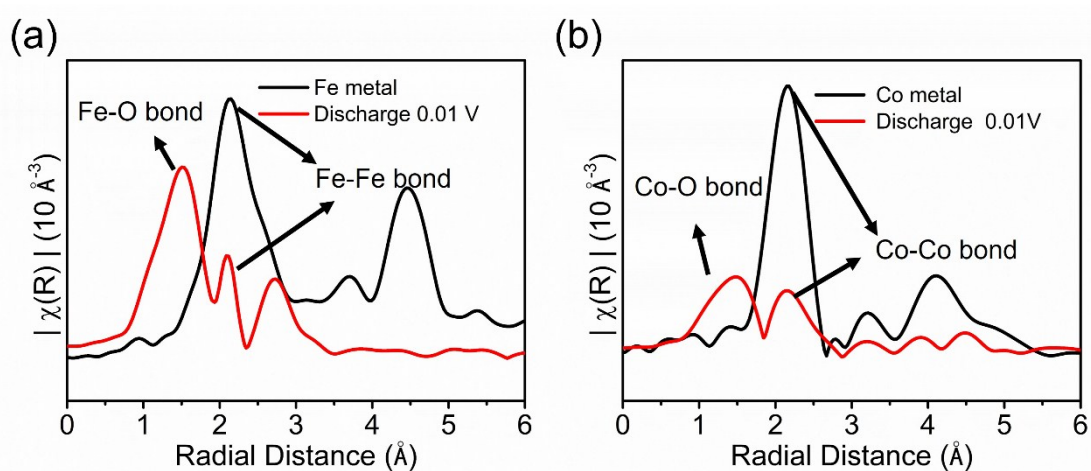

**Fig. S10** (a) Fe and (b) Co edge FT-EXAFS for pristine CoFe-NO<sub>3</sub><sup>-</sup>-LDH electrode the electrode after discharging to 0.01 V.



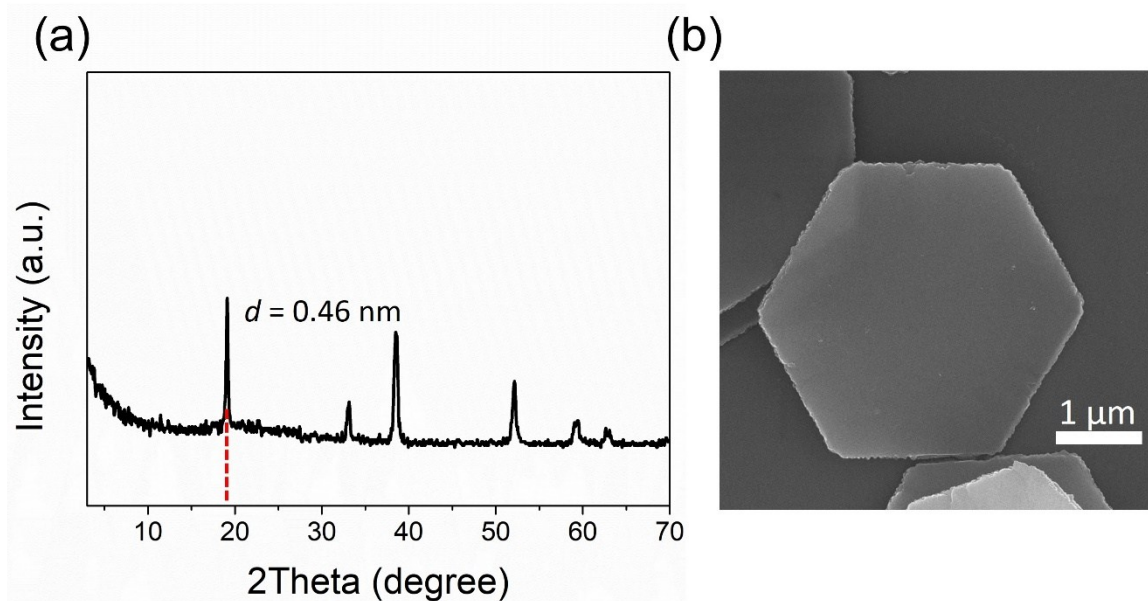

**Fig. S11** (a) XRD pattern and (b) SEM image of  $\text{Co}^{2+}/\text{Fe}^{2+}$  hydroxide.

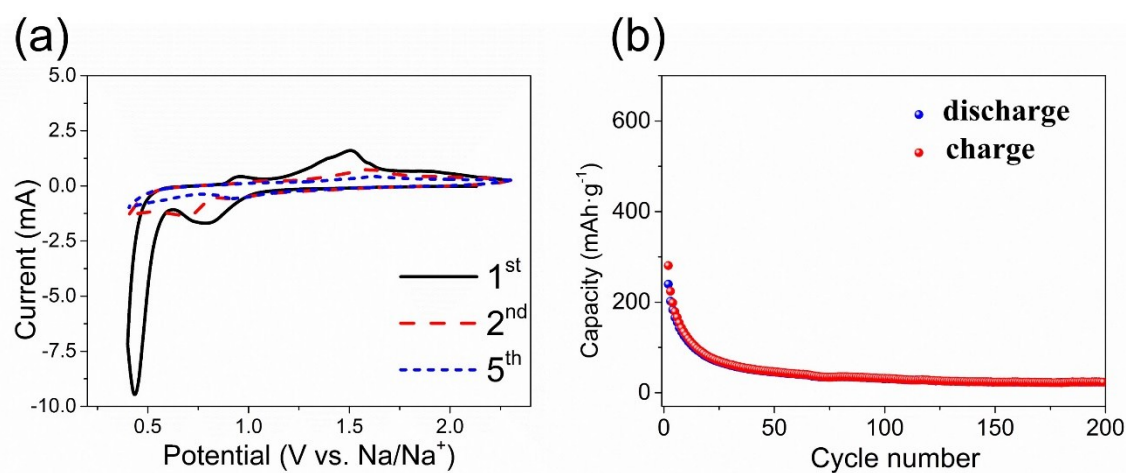

**Fig. S12** (a) CV curves of the  $\text{Co}^{2+}/\text{Fe}^{2+}$  hydroxide at  $0.2 \text{ mV s}^{-1}$ . (b) Cycling performance of  $\text{Co}^{2+}/\text{Fe}^{2+}$  hydroxide electrode tested at  $1 \text{ A g}^{-1}$ .

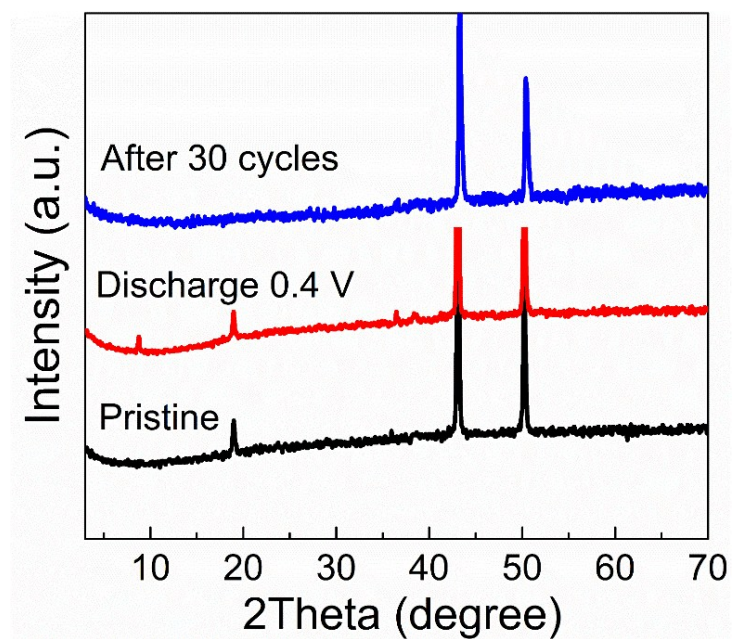

**Fig. S13** XRD patterns of the Co<sup>2+</sup>/Fe<sup>2+</sup> hydroxide electrodes: pristine (black line), after 1st discharging to 0.4 V (red line) and after 30 charge/discharge cycles (blue line).

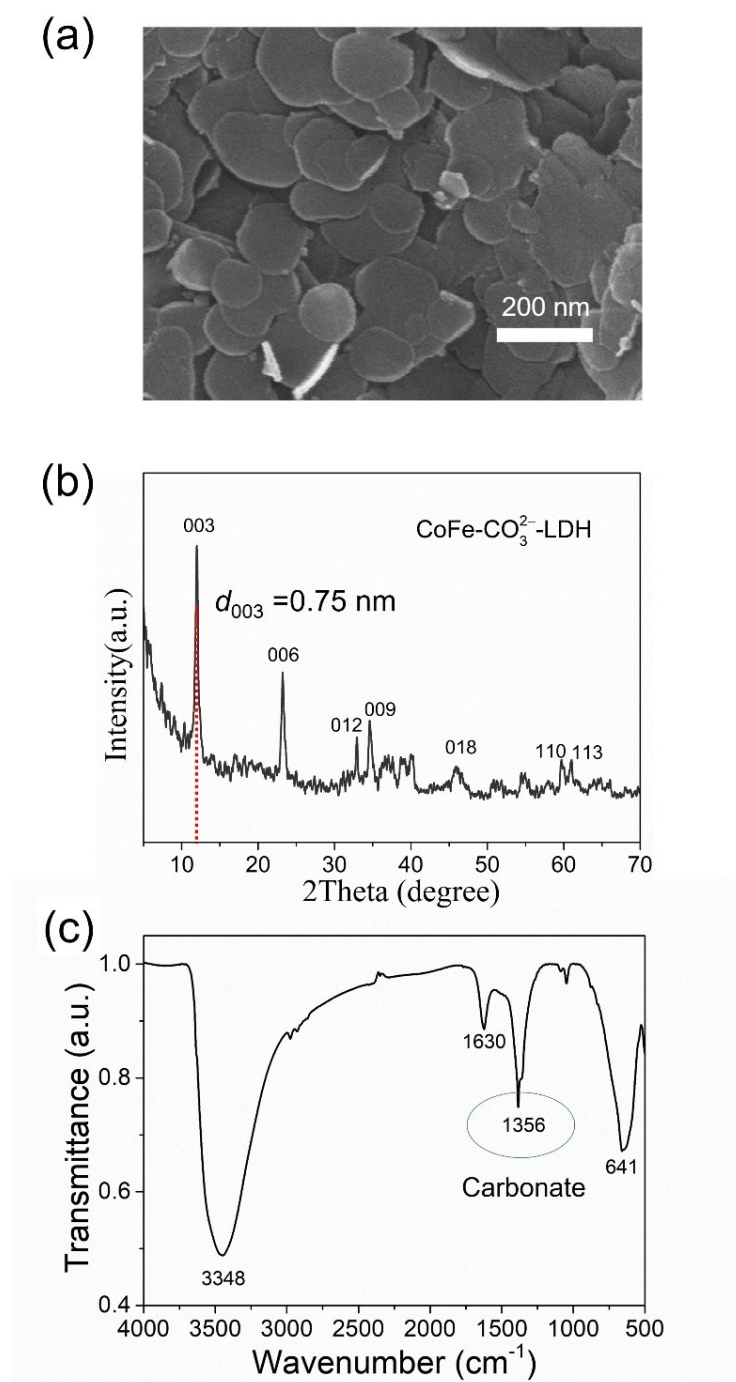

**Fig. S14** (a) SEM image, (b) XRD pattern and (c) FT-IR spectrum of  $\text{CoFe-CO}_3^{2-}\text{-LDH}$ .

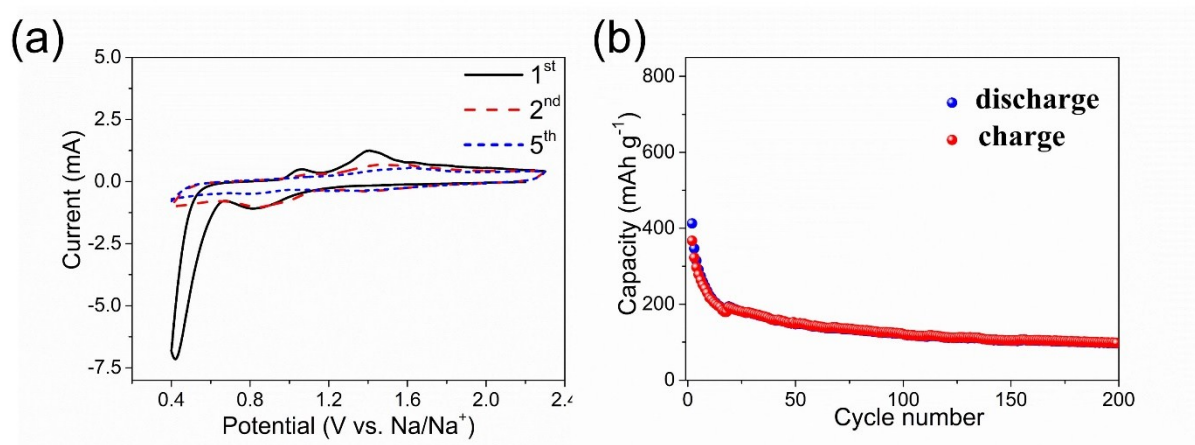

**Fig. S15** (a) CV curves at  $0.2 \text{ mV s}^{-1}$  and (b) cycling performance in 200 cycles at  $1 \text{ A g}^{-1}$  for  $\text{CoFe-CO}_3^{2-}\text{-LDH}$  electrode.

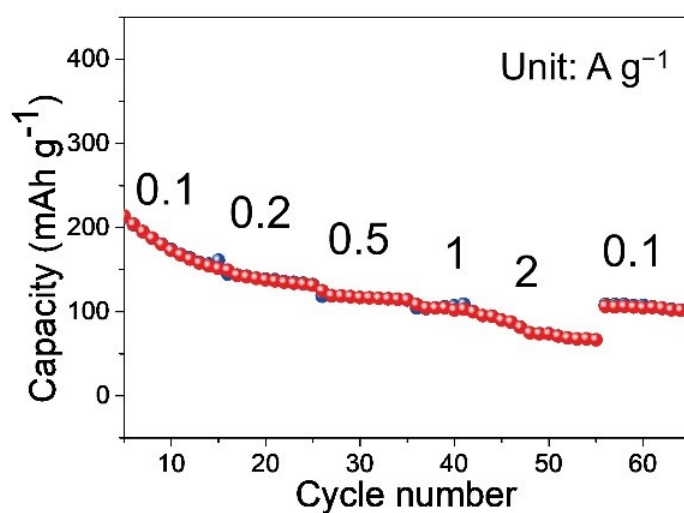

**Fig. S16** Rate performance of the  $\text{CoFe-CO}_3^{2-}\text{-LDH}$ .

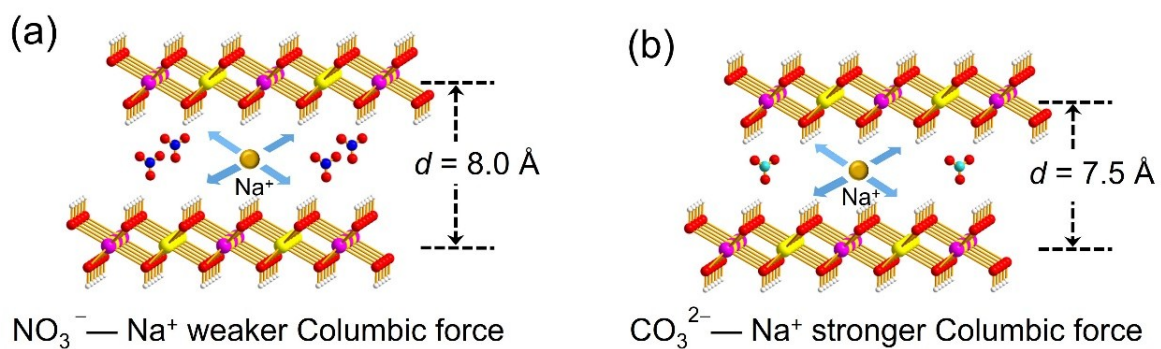

**Fig. S17** Schematic illustration of the  $\text{Na}^+$  diffusion in (a)  $\text{CoFe-NO}_3^-$ -LDH and (b)  $\text{CoFe-CO}_3^{2-}$ -LDH with weaker and stronger Coulombic force, respectively.

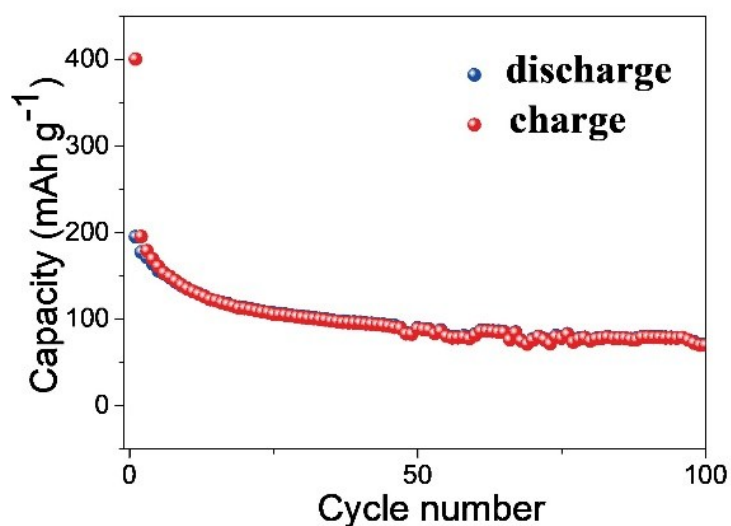

**Fig. S18** Cycling performance of  $\text{CoFe-NO}_3^-$ -LDH electrode without lattice water at a current density of  $1 \text{ A g}^{-1}$  within voltage window of 0.4 to 2.3 V.

## Reference

1. J. P. Perdew, K. Burke and M. Ernzerhof, *Phys. Rev. Lett.*, 1996, **77**, 3865–3868.
2. A. D. Becke, *Phys. Rev. A*, 1988, **38**, 3098–3100.
3. P. E. Blöchl, *Phys. Rev. B*, 1994, **50**, 17953–17979.
4. H. J. Monkhorst and J. D. Pack, *Phys. Rev. B*, 1976, **13**, 5188–5192.
5. G. Henkelman, B. P. Uberuaga and H. Jónsson, *J. Chem. Phys.*, 2000, **113**, 9901–9904.
